# Supplementary material
Source: publisher site journal article supplement (https://www.dovepress.com/article/463572)
Supplement: Supplementary file 1 [file get_supplementary_file.php]

**Supplementary File 1**

**Data base search strategy**

**Quality assessment tool:**

**Table S1. Articles excluded and basis of exclusion.**

| **Author** | **Year** | **Outcome** | **Reason for exclusion** |
| --- | --- | --- | --- |
| Baptist et al. 1 | 2018 | Asthma | Study data was retrieved from a clinical trial |
| Bafadhel et al. 2 | 2011 | COPD | Duplicate |
| Bhargava et al. 3 | 2019 | Asthma | Duplicate |
| Boudir et al. 4 | 2019 | Asthma | Comparison of outcome of phenotypes included in previous record. |
| Brew et al. 5 | 2018 | Asthma | Combined supervised and non-supervised methods |
| Brew et al. 6 | 2019 | Asthma | Duplicate |
| Castaldi et al. 7 | 2017 | COPD | The study was aiming at comparing stability metrics for COPD phenotypes reproducibility |
| Chang et al. 8 | 2014 | Asthma | Study data was retrieved from a clinical trial |
| Chupp et al. 9 | 2013 | Asthma | Phenotyping based on genetic data (genotyping) |
| Delgado Eckert et al. 10 | 2017 | Asthma | Part of the data is derived from clinical trial |
| Ding et al. 11 | 2018 | Asthma | Data from clinical trial |
| Diver et al. 12 | 2018 | Severe asthma and COP | Duplicate abstract of fully included study |
| Eom et al. 13 | 2018 | Asthma | Full data could not be retrieved |
| Fens et al. 14 | 2012 | COPD | Full data could not be retrieved |
| Fernandez et al. 15 | 2018 | Asthma | Phenotyping based on genetic data (genotyping) |
| Granell et al. 16 | 2016 | Wheeze and asthma | Non relevant outcome and method |
| Guo Y et al. 17 | 2015 | Asthma | Full data could not be retrieved |
| He z et al. 18 | 2019 | Obstructive sleep apnea | Non relevant outcome and method |
| Howrylaket al.19 | 2014 | Asthma | Data from clinical trial |
| Humphroies et al.20 | 2019 | Emphysema | Non relevant methods: comparing patterns of CT emphysematous scan to mortality |
| Khavarich et al.21 | 2018 | Asthma | Full data could not be retrieved |
| Khoo et al.22 | 2020 | Wheezing | Outcome is wheezing and phenotyping based on data including genetic data (genotyping) |
| Khoo et al. 23 | 2017 | Asthma | Data from clinical trial |
| Klick et al. 24 | 2018 | COPD | Comparative review of COPD characterization using different methodological approaches |
| Kuhlen et al 25 | 2015 | Asthma | Supervised phenotyping method |
| Kuo et al. 26 | 2011 | Asthma | Non relevant method: using semi supervised method for phenotypes derivation |
| Kupczyk et al. 27 | 2018 | Asthma | Supervised phenotyping method |
| Mason et al. 28 | 2017 | Occupational asthma | Supervised phenotyping method |
| Panico et al. 29 | 2019 | Wheeze | Non relevant outcome: wheeze |
| Patrawalla et al. 30 | 2017 | Asthma | Use of supervised methods based on variables applied in the SARP analysis |
| Prosperi et al.31 | 2014 | Airway diseases | Review article |
| Reiley et al32 | 2018 | severe asthma | Using supervised methods |
| Rennard et al.33 | 2015 | COPD | Supervised phenotyping method |
| Sato Set al34 | 2016 | Idiopathic intestinal pneumonia with emphysema | Non relevant outcome |
| Sharma et al.35 | 2010 | COPD | Data from clinical trial |
| Sohn et al.36 | 2018 | Asthma | Supervised phenotyping method |
| Sukhan et al.37 | 2018 |  | Full data could not be retrieved |
| Wang et al. 38 | 2019 |  | Review of comparison of methods of unsupervised phenotyping of diseases |
| Yang et al. 39 | 2018 | Emphysema | Supervised phenotyping method |

1. Baptist AP, Hao W, Karamched KR, Kaur B, Carpenter L, Song PXK. Distinct Asthma Phenotypes Among Older Adults with Asthma. *Journal of Allergy and Clinical Immunology-in Practice*. 2018 2018;6(1):244-+.

2. Bafadhel M, McKenna S, Terry S, et al. Acute Exacerbations of Chronic Obstructive Pulmonary Disease Identification of Biologic Clusters and Their Biomarkers. *American journal of respiratory and critical care medicine*. 2011 2011;184(6):662-671.

3. Bhargava S, Holla AD, Jayaraj BS, Praveena A, Ravi S, Khurana S, Mahesh PA. Distinct asthma phenotypes with low maximal attainment of lung function on cluster analysis. *Journal of Asthma*. 2019:12.

4. Boudier A, Chanoine S, Accordini S, et al. Data-driven adult asthma phenotypes based on clinical characteristics are associated with asthma outcomes twenty years later. *Allergy*. 2019 2019;74(5):953-963.

5. Brew B, Chiesa F, Lundholm C, Almqvist C. Combining supervised and unsupervised models to characterize asthma phenotypes in children. *European Respiratory Journal*. 2018 2018;52:2.

6. Brew BK, Chiesa F, Lundholm C, Ortqvist A, Almqvist C. A modern approach to identifying and characterizing child asthma and wheeze phenotypes based on clinical data. *PLoS One*. 2019 2019;14(12):e0227091.

7. Castaldi PJ, Benet M, Petersen H, et al. Do COPD subtypes really exist? COPD heterogeneity and clustering in 10 independent cohorts. *Thorax*. 2017 2017;72(11):998-1006.

8. Chang TS, Lemanske RF, Mauger DT, et al. Childhood asthma clusters and response to therapy in clinical trials. *Journal of Allergy and Clinical Immunology*. 2014 2014;133(2):363-+.

9. Chupp GL, Perez MF, Gomez-Arroyo JG, et al. Determination Of Asthma Phenotypes By Unsupervised Transcriptomic Cluster Analysis Of Induced Sputum. *American journal of respiratory and critical care medicine*. 2013 2013;187:1.

10. Delgado-Eckert E, Fuchs O, Kumar N, et al. Functional phenotypes determined by fluctuation-based clustering of lung function measurements in healthy and asthmatic cohort participants. *Thorax*. 2018 2018;73(2):107-115.

11. Ding LL, Li D, Wathen M, Altaye M, Mersha TB. African ancestry is associated with cluster-based childhood asthma subphenotypes. *Bmc Medical Genomics*. 2018 2018;11:11.

12. Diver S, Richardson M, Haldar K, et al. Sputum microbiomic clustering in asthma and COPD reveals a Haemophilus-predominant subgroup. *Allergy*. 2020:10.

13. Eom EJY, J. S.; Kim, Y. K.; Jung, S. S.; Suh, D. I.; Kim, H. Y.; Lim, D. H.; Kim, H. S.; Kim, J. T.; Shin, M. Y.; Baek, H. S.; Woo, S. I.; Shin, Y. H.; Yoo, Y.; Kim, J. K.; Park, J. S.; Kwon, J. W.; Lee, E.; Yang, H. J.; Lee, J. S.; Seo, J. H.; Jang, G. C.; Kim, W. K.; Song, D. J.; Yu, J. H. Heterogeneity of Childhood Asthma in Korea: Cluster Analysis of Children with Asthma from the Korean Childhood Asthma Study (KAS). *Pediatric Pulmonology*. 2018 2018;53:S107-S108.

14. Fens N, van Rossum AGJ, Zanen P, van Ginneken B, van Klaveren RJ, Zwinderman AH, Sterk PJ. COPD subphenotypes in a population-based survey by factor and cluster analysis. *European Respiratory Journal*. 2012 2012;40:1.

15. Fernandez D, Sram RJ, Dostal M, Pastorkova A, Gmuender H, Choi H. Modeling Unobserved Heterogeneity in Susceptibility to Ambient Benzo[a]pyrene Concentration among Children with Allergic Asthma Using an Unsupervised Learning Algorithm. *International journal of environmental research and public health*. 2018 2018;15(1)

16. Granell R, Henderson AJ, Sterne JA. Associations of wheezing phenotypes with late asthma outcomes in the Avon Longitudinal Study of Parents and Children: a population-based birth cohort. *Journal of Allergy and Clinical Immunology*. 2016;138(4):1060-1070. e11.

17. Guo YF, Ning P, Sun TY. LATE-BREAKING ABSTRACT: Exploratory study of clinical phenotypes of airways disease with wheezing by cluster analysis. *European Respiratory Journal*. 2015 2015;46:2.

18. He Z, Armoni Domany K, Nava-Guerra L, et al. Phenotype of Ventilatory Control in Children With Moderate to Severe Persistent Asthma and Obstructive Sleep Apnea. *Sleep*. 2019 2019;

19. Howrylak JA, Fuhlbrigge AL, Strunk RC, Zeiger RS, Weiss ST, Raby BA, Childhood Asthma Management P. Classification of childhood asthma phenotypes and long-term clinical responses to inhaled anti-inflammatory medications. *Journal of Allergy and Clinical Immunology*. 2014 2014;133(5):1289-U494.

20. Humphries SM, Notary AM, Centeno JP, Strand MJ, Crapo JD, Silverman EK, Lynch DA. Deep Learning Enables Automatic Classification of Emphysema Pattern at CT. *Radiology*. 2019 2019:191022.

21. Kharevich O, Lapteva I, Lapteva E. Two phenothypes of severe asthma identified by cluster analysis. *European Respiratory Journal*. 2018 2018;52:2.

22. Khoo SK, Read J, Franks K, et al. Upper Airway Cell Transcriptomics Identify a Major New Immunological Phenotype with Strong Clinical Correlates in Young Children with Acute Wheezing. *J Immunol*. 2019 2019;202(6):1845-1858.

23. Khoo SK, Read J, Franks K, et al. Longitudinal outcomes of different asthma phenotypes in primary care, an observational study. *Npj Primary Care Respiratory Medicine*. 2017 2017;27:6.

24. Kilk K, Aug A, Ottas A, Soomets U, Altraja S, Altraja A. Phenotyping of Chronic Obstructive Pulmonary Disease Based on the Integration of Metabolomes and Clinical Characteristics. *International Journal of Molecular Sciences*. 2018 2018;19(3):17.

25. Kuhlen JL, Wahlquist AE, Nietert PJ, Bains SN. Identification of Asthma Phenotypes in a Tertiary Care Medical Center. *American Journal of the Medical Sciences*. 2014 2014;348(6):480-485.

26. Kuo CHS, Pavlidis S, Loza M, et al. Asthma Phenotypes From Semi-Supervised Machine-Learning Approach Of Bronchial Biopsy And Brush Transcriptomics In U-Biopred. *American journal of respiratory and critical care medicine*. 2015 2015;191:2.

27. Kupczyk M, Dahlen B, Sterk PJ, et al. Stability of phenotypes defined by physiological variables and biomarkers in adults with asthma. *Allergy*. 2014 2014;69(9):1198-1204.

28. Mason P, Scarpa MC, Liviero F, Guarnieri G, Maestrelli P. Distinct Clinical Phenotypes of Occupational Asthma due to Diisocyanates. *Journal of occupational and environmental medicine*. 2017 2017;59(6):539-542.

29. Panico L, Stuart B, Bartley M, Kelly Y. Asthma trajectories in early childhood: identifying modifiable factors. *PLoS One*. 2014 2014;9(11):e111922.

30. Patrawalla P, Kazeros A, Rogers L, et al. Replication Of The Severe Asthma Research Program Cluster Analysis In An Urban Population. *American journal of respiratory and critical care medicine*. 2011 2011;183:1.

31. Prosperi MC, Sahiner UM, Belgrave D, et al. Challenges in identifying asthma subgroups using unsupervised statistical learning techniques. *American journal of respiratory and critical care medicine*. 2013 2013;188(11):1303-12.

32. Riley J, Bansal A, Ponte E, et al. Unbiased clinical cluster analysis across a combined European and a Brazilian severe asthma (SA) population. *European Respiratory Journal*. 2018 2018;52:3.

33. Rennard SI, Locantore N, Delafont B, et al. Identification of Five Chronic Obstructive Pulmonary Disease Subgroups with Different Prognoses in the ECLIPSE Cohort Using Cluster Analysis. *Annals of the American Thoracic Society*. 2015 2015;12(3):303-312.

34. Sato S, Tanino Y, Misa K, et al. Identification of Clinical Phenotypes in Idiopathic Interstitial Pneumonia with Pulmonary Emphysema. *Internal Medicine*. 2016 2016;55(12):1529-1535.

35. Sharma S, Miller DP, Emmett A, Li H. Cluster Analysis For The Identification And Replication Of Distinct Subject Clusters From COPD Clinical Trials. *American journal of respiratory and critical care medicine*. 2010 2010;181:1.

36. Sohn S, Wi CI, Wu ST, et al. Ascertainment of asthma prognosis using natural language processing from electronic medical records. *Journal of Allergy and Clinical Immunology*. 2018 2018;141(6):2292-2294.

37. Sukhan VS. Cluster analysis of the phenotype of asthma and obesity. *Wiad Lek*. 2018 2018;71(2):319-321.

38. Wang Y, Zhao Y, Therneau TM, et al. Unsupervised machine learning for the discovery of latent disease clusters and patient subgroups using electronic health records. *J Biomed Inform*. 2019 2019;102:103364.

39. Yang J, Angelina E, Balte P, et al. Late Breaking Abstract - Unsupervised machine learning of novel emphysema subtypes: SPIROMICS. *European Respiratory Journal*. 2018 2018;52:2.

**Table S2: Quality assessment results, indicating the number of studies reporting on the different quality items for each outcome.**

| **Outcome (number of studies)** | **Asthma**  **n = 60** | | | | | **COPD**  **n =28** | | | | | **Severe asthma**  **n = 19** | | | | | **Asthma and COPD n =4** | | | | | **Rhinitis**  **n =9** | | | | |
| --- | --- | --- | --- | --- | --- | --- | --- | --- | --- | --- | --- | --- | --- | --- | --- | --- | --- | --- | --- | --- | --- | --- | --- | --- | --- |
| **Quality items** | **Yes** | | **No** | | **Not indicated** | **Yes** | | **No** | | **Not indicated** | **Yes** | | **No** | | **Not indicated** | **Yes** | | **No** | | **Not indicated** | **Yes** | | **No** | | **Not indicated** |
| Aspect of sampling method | | | | | | | | | | | | | | | | | | | | | | | | | |
| Study subjects selected based on specific characteristics without total inclusion | 42 | 11 | | 7 | | 19 | 3 | | 2 | | 11 | 1 | | 3 | | 2 | 2 | | 0 | | 7 | 2 | | 1 | |
| Were the study subjects selected using a random sample | 10 | 34 | | 16 | | 1 | 16 | | 7 | | 2 | 5 | | 8 | | 2 | 2 | | 0 | | 1 | 7 | | 2 | |
| Systematic difference between study participant and non-participants? | 4 | 6 | | 50 | | 0 | 3 | | 21 | | 0 | 3 | | 12 | | 0 | 1 | | 3 | | 1 | 3 | | 6 | |
| Systematic difference between observed and missing data | 5 | 12 | | 43 | | 1 | 5 | | 18 | | 0 | 0 | | 15 | | 0 | 0 | | 4 | | 1 | 2 | | 7 | |
| Implemented strategy to recover missing data | 7 | 32 | | 16 | | 1 | 10 | | 17 | | 1 | 6 | | 12 | | 2 | 2 | | 0 | | 2 | 5 | | 2 | |
| Method of outcome definition | | | | | | | | | | | | | | | | | | | | | | | | | |
| Gold standard criteria, physician diagnosis assisted by clinical biomarkers | 38 | 8 | | 14 | | 17 | 2 | | 5 | | 12 | 0 | | 3 | | 2 | 2 | | 0 | | 4 | 4 | | 2 | |
| Clinical biomarkers | 19 | 24 | | 17 | | 9 | 9 | | 6 | | 6 | 5 | | 4 | | 3 | 1 | | 0 | | 3 | 5 | | 2 | |
| Subjects self-report of illness | 6 | 39 | | 15 | | 1 | 17 | | 6 | | 1 | 10 | | 4 | | 1 | 3 | | 0 | | 3 | 5 | | 2 | |
| Self-reported of physician diagnosis | 7 | 35 | | 16 | | 2 | 14 | | 8 | | 1 | 10 | | 4 | | 0 | 4 | | 0 | | 1 | 6 | | 3 | |
| Standard codes (e.g., ICD, ATC) used in registers or database? | 6 | 38 | | 11 | | 5 | 11 | | 12 | | 0 | 10 | | 9 | | 0 | 4 | | 0 | | 2 | 5 | | 2 | |
| Method of variables selection | | | | | | | | | | | | | | | | | | | | | | | | | |
| Variable(s) reflecting symptom profile | 34 | 11 | | 15 | | 16 | 3 | | 5 | | 7 | 5 | | 3 | | 3 | 1 | | 0 | | 7 | 1 | | 2 | |
| Variable(s) reflecting risk factors of the disease | 32 | 12 | | 16 | | 17 | 2 | | 5 | | 9 | 3 | | 3 | | 3 | 0 | | 1 | | 5 | 3 | | 2 | |
| Variable(s) reflecting a measure of the disease definition | 36 | 9 | | 10 | | 14 | 5 | | 9 | | 8 | 4 | | 7 | | 3 | 0 | | 1 | | 6 | 1 | | 3 | |
| Aspect of clinical and scientific relevance | | | | | | | | | | | | | | | | | | | | | | | | | |
| Phenotypes assessed for clinical relevance | 45 | 9 | | 6 | | 18 | 4 | | 2 | | 11 | 2 | | 2 | | 3 | 1 | | 0 | | 9 | 0 | | 1 | |
| Phenotypes assessed for biological relevance | 16 | 36 | | 8 | | 5 | 17 | | 2 | | 1 | 12 | | 2 | | 2 | 2 | | 0 | | 4 | 5 | | 1 | |
| Phenotypes assessed for epidemiological relevance | 18 | 35 | | 2 | | 9 | 13 | | 6 | | 3 | 10 | | 6 | | 0 | 4 | | 0 | | 2 | 7 | | 0 | |
| Reproducibility aspect | | | | | | | | | | | | | | | | | | | | | | | | | |
| Reporting information on methods of variables’ selection | 24 | 10 | | 26 | | 11 | 4 | | 9 | | 5 | 2 | | 8 | | 2 | 0 | | 2 | | 7 | 1 | | 2 | |
| Reporting on handling of noise and variation in types of data | 9 | 39 | | 12 | | 3 | 16 | | 5 | | 3 | 7 | | 5 | | 1 | 3 | | 0 | | 4 | 5 | | 1 | |
| Reporting on visualization of data and techniques used | 25 | 25 | | 10 | | 6 | 14 | | 4 | | 4 | 6 | | 5 | | 2 | 2 | | 0 | | 2 | 7 | | 1 | |
| Motives or Statistical tests guiding the selection of algorithms or methods | 25 | 23 | | 12 | | 5 | 13 | | 6 | | 5 | 4 | | 6 | | 1 | 2 | | 1 | | 0 | 8 | | 2 | |
| Reporting information on handling of missing data | 12 | 35 | | 13 | | 1 | 18 | | 5 | | 4 | 6 | | 5 | | 3 | 1 | | 0 | | 1 | 8 | | 0 | |
| Reporting information on using of tools for reproducing machine learning projects | 20 | 25 | | 10 | | 5 | 15 | | 8 | | 3 | 6 | | 10 | | 0 | 2 | | 2 | | 2 | 8 | | 0 | |
| Reporting information about How were the number of phenotypes ascertained. | 34 | 11 | | 15 | | 16 | 3 | | 5 | | 9 | 0 | | 6 | | 2 | 2 | | 0 | | 6 | 3 | | 1 | |
| Reporting information on use of statistical or clinical validation of the derived clusters. | 30 | 19 | | 11 | | 18 | 3 | | 3 | | 5 | 6 | | 4 | | 2 | 1 | | 1 | | 8 | 1 | | 1 | |

**Table S3: Number and list of variables used for asthma phenotyping.**

| **Reference ID and country** | **Population age** | **Number of variables** | **Variables considered for analysis** |
| --- | --- | --- | --- |
| Amaral et al. 2019,  US | Adults | 15 | Limit activity by wheezing; Wheezing with exercise; Sleep disturbance by wheezing; Wheezing attack; FEV1/FVC; Absenteeism by wheezing; Emergency department visit by asthma; Female; FEV1; FeNO ≥ 35 ppb; B-Eos ≥ 300/mm3; Ever-smoked; Hay fever; BMI ≥ 30 kg/m2 and Early asthma onset. |
| Amelink et al. 2013.  Amsterdam | Adults | 35 | Reversibility in FEV1; pbFEV1 in percentage predicted; pbFVC in percentage predicted; pbFEV1/FVC in percentage predicted; KCO in percentage predicted; RV%/TLC in percentage predicted; gender; race; medication use and number of exacerbations. |
| Bhargava et al. 2018.  India | Adults |  | Demographic characteristics, age at disease onset, disease duration, smoking and indoor air pollution, BMI, serial lung functions and allergen sensitization. |
| Benton et al. 2010.  USA | Children and adolescents | 11 | ITG Daytime Symptoms Score; ITG Nighttime Symptoms Score; ITG Functional Limitations Score; Asthma Control TestTM; Post-bronchodilator FEV1, % predicted; Post-bronchodilator FEF25-75, % predicted; Post-bronchodilator FEV1/FVC, % predicted; Nasal eosinophils, %; Nasal neutrophils, %; Blood eosinophils, % and Total serum IgE, IU/mL |
| Bochenek et al.2014.  Poland | Adults | 68 | Asthma age of onset, body mass index (BMI), asthma control, asthma related emergency department (ED) visits, hospitalizations, and stays in the intensive care unit (ICU), upper airway symptoms, occurrence of nasal polyps, and history of polypectomies as indicators of chronic rhinosinusitis, FEV1 percent predicted, DFEV1 after bronchodilator, skin prick test responses, total IgE levels, and blood eosinophilia, sex and asthma duration. |
| Boudier et al. 2013.  Multicounty | Adults | 9 | Asthma symptom score, waking up by attack of cough, 12-month productive cough, asthma attack within 12 months, asthma treatment, allergic sensitization, total IgE and bronchial hyperresponsiveness. |
| Cabral et al. 2016.  Brazil | Children and adolescents | 20 | Gender; obesity; race; asthma severity; age at the onset of asthma; asthma triggers; blood eosinophils; number of previous asthma hospitalizations; tendency toward exacerbation; history of ICU admission; specific serum IgE levels; gastroesophageal reflux; sinus infection; baseline FEV1 (% predicted); FEV1/FVC ratio; labile FEV1; presence of fixed airway obstruction; best response to bronchodilator |
| Celejewska-Wójcik et al. 2020.  Poland | Adults | 16 | Sex; BMI; Age at asthma onset; Asthma control and severity; Use of inhaled and/or oral steroids; History of asthma exacerbations; FEV1; Blood eosinophil count; Total serum IgE; Atopy status determined by skin prick tests; Induced sputum inflammatory cells; Selected eicosanoids – PGD2, PGE2, LTE4. |
| Chanoine et al.2017.  France | Adults | 1 | The controller-to-total asthma medication ratio was described among elderly women with ever asthma using a 0.5-threshold. |
| Couto et al. 2015.  Portugal | Adults | 9 | Presence of respiratory symptoms; current use of asthma medication; presence of rhinitis or other allergic diseases; conjunctivitis; urticaria; eczema; anaphylaxis; drug, food, and venom allergies. |
| Cruz et al. 2018 (abstract).  Brazil | Adults | 8 | Not indicated |
| Damiens K et al.2013.  Canada | Adults | 12 | Age, sex, body mass index, smoking, atopy, occupational rhinitis, inhaled corticosteroids, FEV, PC20, sputum eosinophils and neutrophils, occupational agent (high [HMW] or low [LMW] molecular weight agents), duration of exposure and work status (at or off work) at the time of investigation. |
| Deliu et al. 2016.  Turkey | Children | 68 | Not indicated |
| Deliu et al. 2018.  Turkey | Children | 45 | Sex; maternal allergic disease; Father with allergic disease; Exposure to tobacco smoke; Pet ownership; Atopic; Sensitized to house dust mite; Sensitized to grass; Sensitized to trees; Sensitized to weeds; Sensitized to molds; Sensitized to cat; Sensitized to dog; Sensitized to cockroach; Blood Eosinophil % 0.15-0.3; Blood Eosinophil % 0.3-0.5; Blood Eosinophil % >0.50; IgE total; Use of long-acting beta2 agonist; Use of Montelukast; Use of regular controller medication; No use of inhaled corticosteroids. |
| Depner et al. 2013.  Multicountry | Children | Not indicated | Specific immunoglobulin levels, FeNO measurement and lung functions asthma medication. |
| Dudchenko et al. 2018.  Russia | Adults | 23 | Disease control according to Asthma Control Test (AST), the frequency of asthma attacks per day, the severity of asthma attacks, the use of short-acting bronchodilators, the severity of shortness of breath, the frequency of coughing per day, sleep disturbances, physical activity during the daytime, constancy, prevalence and number of dry wheezing, the presence and shortness of breath in the previous year, choking in the previous year, reaction to irritants and weather changes, vital lung capacity (VC), forced VC (FVC), FEV1, peak expiratory flow rate (PEFV), average volumetric expiratory flow rate at the level of 25-75 % FVC (SOS25-75), instantaneous volumetric expiratory flow rates at the level of 25, 50 and 75% FVC (respectively MOS25, MOS50 and MOS75). |
| Folz et al.2018. USA | Adults | Not indicated | Not indicated |
| Fontanella et al. 2018.  UK | Children | Not indicated | Serum IgE to 112 allergenic molecules using ImmunoCAP ISAC. |
| Gonem S et al. 2012 (abstract).  UK | Adults | Not indicated | Not indicated |
| Gower WA et al. 2013 (abstract).  USA | Children | 9 | Age of asthma onset, asthma duration, gender, race, BMI, lung function- FEV1, FEV1/FVC, presence of allergy and Hospitalization. |
| Hilvering et al. 2015 (abstract).  Netherland | Adults | Not indicated | Not indicated |
| Hsiao HP et al.2018.  Taiwan | Adults | 29 | Age, Age of asthma onset, Early-onset asthma, Asthma duration, BMI, Obesity, Body fat, Waistline, Waist circumference/hip circumference, Smoking history, FEV1, % predicted, FVC, % predicted, FEV1/FVC ratio, Total IgE, Allergic rhinitis, Atopic dermatitis, WBC count, Neutrophil %, Eosinophil %, Monocyte %, Lymphocyte %, Basophil %, Breathlessness (wk), Breathlessness, during sleeping, Sneezing and nasal congestion, inhaled corticosteroid (ICS), oral corticosteroid (OCS), Number of controllers, Antihistamine. |
| Ilmarinen P et al.2017.  Finland | Adults | Not indicated | Duration of respiratory symptoms before diagnosis; Feno at follow-up; Rhinitis at follow-up (yes/no); "Did you have respiratory symptoms suggesting asthma during childhood (<16 y) even though asthma had not been diagnosed?" (yes/no); Blood neutrophils at follow-up; "Does your asthma aggravate during working day?" at follow-up (yes/no); Maximal response in FEV1 (from diagnosis to Max0-2.5); BMI at follow-up; FEV1 reversibility at diagnosis; FEV1 reversibility at follow-up; Number of other than asthma/allergy-related drugs in use at follow-up; ACT score at follow-up; Smoking status at diagnosis (current/ex/never); Post-BD FEV1/FVC at diagnosis; Pre-BD FVC at follow-up. |
| Jeong A et al.2016.  Switzerland | Adults | 7 | Asthma attack in the last 12 months, current asthma medication, number of asthma symptoms in the last 12 months, five typical respiratory symptoms were considered: breathless while wheezing, chest tightness, shortness of breath at rest, shortness of breath after exercise, and woken by shortness of breath at night, number of asthma symptoms repeatedly reported from baseline to the second follow-up, atopy defined by positive skin prick test at baseline for common allergens (cat fur, dog epithelia, house dust mite, dermatophagoides, pteronyssinus , timothy grass pollen, birch pollen, Parietaria pollen, and the moulds, Alternaria and Cladosporium), nasal allergy as hay fever, age of asthma onset. |
| Just J et al. 2012.  France | Children | 10 | Age; Body mass index (BMI); Asthma duration (,<5 or ≥5 years); Maternal or paternal asthma; Allergic sensitization to aeroallergens and trophoallergens (positive skin-prick test and confirmed positive specific immunoglobulin E); Total IgE level; Inflammatory markers (lymphocyte, neutrophil, eosinophil, basophil, monocyte counts, serum IgG, IgA, IgM levels); Lung function (FEV1 expressed as a percentage of predicted value); Severity (mild persistent, moderate persistent, severe persistent); Control (controlled, partially controlled, uncontrolled) according to Global Initiative for Asthma (GINA) guidelines. |
| Just J et al. 2014.  France | Children | 18 | Sex, age, eczema, food allergy, asthma duration, mild or moderate to severe asthma, and hospitalization for exacerbation. Four classes were defined for asthma control as previously defined: controlled or uncontrolled (or partially controlled), with or without high doses of ICS. paraclinical parameters (total IgE level, type and number of allergens to which the child was sensitized, FeNO, FVC, FEV1, and FEF25-75) and environmental parameters (tobacco smoke, mold, cockroaches, and furred pet exposure). |
| Kaneko Y et al.2013.  Japan | Adults | 8 | Age, sex, smoking status (current, past or never), age at onset, total IgE levels, atopic status (specific IgE responsiveness to common inhaled allergens), baseline FEV1, and FEV1/FVC. |
| Kim HJ. et al.2018.  Korea | Adults | 9 | Age at enrollment, sex, body mass index (BMI), age at asthma onset, and asthma duration, was collected at the baseline visit; all patients underwent standardized assessments, which encompassed peripheral blood total and differential cell counts, serum total immunoglobulin E (IgE), chest radiography, and skin prick tests with 24 common inhalant allergens |
| Kim MA. et al.2017.  Korea | Adults | 12 | Age at enrollment, sex, BMI, age at asthma onset, asthma duration, smoking amount, atopy, peripheral blood eosinophils (%), total IgE level, FEV1, ΔFEV1, and PC20. |
| Kim TB. et al. 2013.  Korea | Adults | 10 | Demographic parameters; Body mass index (BMI); Complete blood cell count; Total serum IgE levels; Pulmonary function tests (FEV1, FVC, FEV1/FVC ratio); Airway hyperresponsiveness (AHR); Methacholine bronchial provocation test; Skin prick tests with 12 common allergens; Smoking status; History of hospital visits due to asthma exacerbation in the previous year. |
| Koike et al. 2018.  Not indicated | Adult | 2 | Fraction exhaled Nitric oxide and forced oscillation technique (FOT). |
| Kwon et al. 2012 (abstract).  Korea | Children | Not indicated | Blood tests for total IgE, eosinophil fraction, skin prick test, spirometry, and methacholine bronchial challenge test. |
| Lee E et al. 2017.  South Korea | Children | 14 | Sex; body mass index (BMI); monthly house hold income; maternal education level; environmental tobacco smoke (ETS), parental history of allergic diseases (AD, AR, and/or asthma); onset age of the first wheezing, number of absence days from school and nocturnal awakening days owing to asthma attacks, number of asthma attacks in the previous 12 months, number of days with treatment for asthma in the previous 12 months at the time of enrollment, and SPT, blood tests, and lung function tests at the time of enrollment. |
| Liang et al. 2016.  China | Adults | 39 | The levels of EGF; GM-CSF; IFN-g; IL-1b; IL-4; IL-5; IL-6; IL-8; IL-9; IL-10; IL-13; IL-17; IL-23; IL-33; Leptin; sRAGE; TGF-b1; TNF-a; TSLP; VEGF; (Age; Sex; BMI; Atopy; Smoking Duration; Serum total IgE; Blood WBC; Blood eosinophil; Blood neutrophil; Blood basophil; Sputum eosinophil; Sputum neutrophil; Sputum macrophage; Sputum lymphocyte; Baseline FVC; Baseline FVC% pred; Baseline FEV; Baseline FEV1% pred; Daytime symptom score; Night time symptom score; ACQ-5) |
| Loureiro et al. 2015.  Portugal | Adults | 22 | Gender ; age ; BMI ; duration of illness ; age at onset of diseases ; IgE sensitization ; exposure to any smoke ; Pneumonia history ; Rhinitis ; Anxiety ; depression ; No of comorbidities.; Disease control ; Asthma control test (ACT) ; CARAT (Rhinitis) ; CARAT (Asthma) ; Asthma life quality (ALQ) ; Severe asthma score (SOA) ;Therapeutics (GINA as Until step3) ; High-dose ICS ; frequency of using OCS (last year) ; Severe exacerbation (previous year) ; FEV1 (%) baseline; FEV1/CVF (%) at baseline ; Fixed obstruction ; WHO severity status ; FeNO (ppb) ; Serum IgE (log (mmol/L)) ; Blood eosinophils (%):; Sputum eosinophils (%) ; Sputum neutrophils (%) . |
| Loza et al. 2016.  Multicountry | Adults | 10 | FEV1; FVC expressed as % predicted; FEV1/FVC ratio; bronchodilator reversibility (BDR); airway hyper-responsiveness (AHR), i.e., log-transformed provocative concentration of methacholine resulting in a 20% decline in FEV1 from baseline (PC20); Asthma Control Questionnaire (ACQ-7); Asthma Quality of Life Questionnaire (AQLQ); log-transformed FENO; and blood eosinophil counts expressed as absolute counts per μL. |
| Mahut et al. 2011.  France | Children | 28 | Sex; Age; Height; Weight; BMI; Atopic status (negative, 1 positive, > 1 positive); Tobacco exposure (maternal, paternal, paternal and maternal); Clinical events within past 3 months (controlled, partially or uncontrolled, number of days with symptoms, severe exacerbation, number of days with systemic steroid); Treatment (beta-agonist on demand, low ICS dose with mean ± SD dose, medium ICS dose with mean ± SD dose, high ICS dose with mean ± SD dose, LABA); Pulmonary function tests (sRaw % predicted, FEV1 % predicted, FEV1/FVC %, FVC % predicted, FEF75-25% predicted, FEF50% predicted, TLC % predicted, FRC % predicted, RV % predicted, RV/TLC, FEF50 %/TLC, FENO 0.05 ppb median [IQ]) |
| Mäkikyrö et al. 2017.  Finland | Adults | 7 | Use of controller asthma medication, bronchodilators, oral corticosteroids, and/or antibiotics during asthma exacerbations, and use of various healthcare services. All of these were inquired for the past 12 months. In addition, St. George’s Respiratory Questionnaire score in the past 4 weeks was applied. |
| Mason et al. 2018.  Italy | Adults | 13 | Age; sex; BMI; smoking status; Atopy; FEVQ/FVC % predicted at baseline; FEV1 predicted baseline; pre=SIC pd20 methacholine test; response to agent (TDI/HDI/MSI); eosinophils in peripheral blood %; neutrophiles in peripheral blood %; type of reaction (early/late/dual) ; age at onset. |
| Mastalerz et al. 2015.  Poland | Adults | 19 | Sex, age at asthma onset, BMI, asthma control and severity, use of inhaled and/or oral steroids, presence of chronic rhinosinusitis, history of sinus surgery, FEV1, blood eosinophil count, total serum IgE, skin prick tests, induced sputum inflammatory cells and selected eicosanoids – PGD2, PGA2, PGE2, LTE4, 5-HETE; was applied on collected data set. |
| Nadif et al, 2018.  France | Adults | 25 | Not inclusive (respiratory symptoms, asthma exacerbation and treatment, lung function, allergic sensitization, and added blood eosinophil and neutrophil counts, and fluorescent oxidation products (FlOPs) level.) |
| Nagasaki et al. 2014.  Japan | Adults | 7 | Asthma Control Test (ACT) scores; serum IgE levels; blood eosinophil counts; prebronchodilator percent predicted FEV1; age; gender; BMI. |
| Nasreen et al. 2019.  Canada | Children | 5 | Time since asthma diagnosis; sex of the child, child having health professional diagnosed allergy as a proxy for allergen sensitization or atopy of the child, at least 1 biological parent with a history of health professional diagnosed asthma or allergy, smoking habit of parent or spouse as a proxy for exposure to environmental tobacco smoke at home, number of siblings at home, and age at asthma diagnosis. |
| Qui et al. 2018.  Korea | Adults | 13 | Gender, BMI, smoking, age at onset, age at enrollment, FEV1 predicted and FEV1/FVC (%), fef 25,74, blood eosinophilia and blood neutrophile, serum IgA, PACO2, PAO2. sputum neutrophil and sputum eosinophiles. |
| Sakagami et al. 2011.  (abstract)  Japan | Adults | 7 | Gender, body Mass Index, asthma Control Test Score, Patient Health Questionnaire -9 (PHQ-9) Score, disease duration, age of onset and type of asthma. |
| Schatz et al, 2013.  USA | Adults and children | 8 | Sex, race, atopy, age of asthma onset, smoking (adolescents and adults), passive smoke exposure (children), obesity, and aspirin sensitivity |
| Schimdlin et al. 2015.  (Abstract);  USA | Children | 8 | Sex, race, peak flow, FEV1%, FVC%, FEF25-75%, early aeroallergen and food sensitization, and wheezing at ages 1, 2, 3, 4, and 7. |
| Sendín-Hernández et al. 2018.  Spain | Adults | 20 | Age; sex; body mass index (BMI); family history of atopy (defined as a first-degree antecedent with atopic dermatitis, asthma, or allergic rhinitis); family history of asthma; family history of rhinoconjunctivitis; age of onset of asthma; age of onset of rhinitis; atopic dermatitis; allergic rhinoconjunctivitis; smoking status; lung function; fractional exhaled nitric oxide (FENO); eosinophil peripheral blood count; serum total IgE levels; severity of asthma according to GEMA 2009,15; use of inhaled steroids; use of long-acting bronchodilators; use of oral corticosteroids |
| Seino et al. 2018.  Japan | Adults | 10 | BMI, smoking status, OCS burst episode, frequency of asthma attacks in the previous year, comorbidities (heart diseases), the drug used [long-acting muscarinic antagonists (LAMA), oral sustained-released theophylline (OSRT), oral corticosteroids (OCS)], and ACT-J and ASK-12 scores. |
| Seys et al. 2017.  Belgium | Adults | 12 | Sputum mRNA expression level of the following cytokines: IFN-γ, IL-4, IL-5, IL-13, IL-10, IL-17A, IL-17F, IL-22, IL-25, TNF, IL-6 and IL-1β. |
| Siroux V et al. 2011  Multicountry | Adults | 14 | Age; sex; asthma symptoms over the past 12 months; asthma attacks over the past 12 months; age at asthma onset; asthma exacerbation; asthma treatment; chronic cough or phlegm; allergic rhinitis; atopic dermatitis; specific sensitization; total IgE; FEV1 % predicted. |
| Tay et al. 2019.  Singapore | Adults | 9 | Age of asthma onset, sex, ethnicity, smoking status, body mass index, lung function, blood eosinophil count, asthma control test score, and exacerbation frequency |
| Tuskiko et al. 2017.  Japan | Adults | 6 | Age at onset, eosinophilic inflammation, airflow variability, and IgE levels, sex and age. |
| Wang LL et al. 2017.  China | Adults | 18 | Sex; age; body mass index (BMI); atopy; history of smoking; socioeconomic status (SES; including educational level, health insurance, monthly income status, and employment status); asthma duration; age at asthma onset; asthma severity; FEV1 (liters); FEV1/FVC ratio; FEV1 percentage predicted (FEV1%predicted); ACT score; AQLQ score; and psychological symptoms. |
| Watanabe et al. 2016 (abstract);  Japan | Adults | Not indicated | Not indicated |
| Wisnivesky et al;2019  USA | Adults | 20 | Sociodemographic, asthma history, severity, medication, and control; resource utilization as emergency and drug utilization and comorbidities as mental health GERD, serum IgE to sensitization to indoor allergen and lung function spirometry measures. |
| Wu et al.2017.  China | Adults | 26 | Age, atopy, FEV1, FVC, and LM score, sex, age at first symptoms of rhinitis, age at first symptoms of asthma, disease duration, age at asthma diagnosis, adult-onset, smoker, prior sinus surgery, history of NSAID sensitivity, history of family asthma, Dmin value, total IgE, FeNO, blood eosinophil percentage, tissue eosinophil, blood neutrophil percentage, eosinophilia phenotypes of upper airway, eosinophilia phenotypes of lower airway severe asthma, FEV1/FVC ratio, and PEF. |
| Yoon et al. 2019.  Korea | Children | 12 | Sex, age, current diagnosis of allergic rhinitis, current diagnosis of atopic dermatitis, history of acute bronchiolitis, puberty stage, age at asthma onset, PC20 from the methacholine challenge test, atopy defined as a positive response to at least 1 allergen on skin prick tests, baseline predicted FEV, and frequency of asthma symptoms. |
| Zaihra T et al.2016.  Canada | Adults | 13 | FEV1 < 80 %, Beclomethasone or equivalent dose, AOO, year ACQ, Female, Severe asthmatic, Atopic, Non-Smoker, Age, BMI, Sputum Neutrophils, Sputum Eosinophils, FENO ppb. |
| Zhang X et al. 2019 (abstract).  China | Adults | 11 | Inspiratory: mean of LA/BSA, mean of T/BSA, Mean of WA/BSA, mean of TA/BSA mean of WA, mean of Pi10WA, expiratory: MLD air trapping indexes: expiratory VI−856, MLD E/I , VI−856/−950 E-I, VI−856 E-I. |
| Zoratti E et al. 2018;  USA | Adults | 8 | Sex, race, markers of atopy, including the number of self-reported allergic triggers (pollen, animals, mold, dust), history of allergic rhinitis or atopic dermatitis, and serum total IgE level; age at asthma onset; smoking status (adults) or passive smoke exposure (children); body mass index (BMI); self-reported history of aspirin sensitivity; and (8) ratio of FEV1 to forced vital capacity (FVC) (FEV1:FVC) from spirometry performed according to American Thoracic Society guidelines. |

**Table S4: Number and list of variables used for COPD phenotyping.**

| **Reference ID and country** | **Number of variables** | **Variables considered for analysis** |
| --- | --- | --- |
| Augustin et al; 2018.  Netherland | 27 | FEV1; % predicted; FEV1/FVC; %; FVC; % predicted; PEF; % predicted; ITGV; % predicted; RV; % predicted; TLC; % predicted; TLCO; % predicted; KCO; % predicted; MIP; % predicted; MEP; % predicted; arterial blood gases (PaO2; PaCO2); SaO2; %; FEV1; FVC; PEF; ITGV; RV; TLC; TLCO; KCO; TLCH; VIN; TA; MIP; MEP |
| Bafadhel et al.; 2011.  UK | Not indicated | Not indicated |
| Bertini et al.; 2013.  Italy | 35 | Not indicated |
| Burgel et al.; 2017  France | 7 | Age; body mass index (BMI); FEV1 (% predicted); modified Medical Research Council (mMRC) dyspnea scale; number of exacerbations in the previous 12 months; and presence/absence of cardiovascular comorbidities (hypertension; coronary artery disease and/or left heart failure) and/or diabetes. |
| Burgel et al.; 2010  France | 8 | Age, tobacco smoking, severity of airflow obstruction (assessed by FEV1 % pred); exacerbations (number per patient per year); nutritional status (assessed by BMI kg*m-2); dyspnea (assessed by the MMRC scale); HRQoL (assessed by the SGRQ total score); and anxiety and depression (assessed by the HAD total score) |
| Burgel et al.; 2012  Belgium | 7 | Age, body mass index (BMI), FEV1 (% predicted), mMRC scale, CCQ total score, thoracic gas volume (TGV, % predicted) and DLCO (% predicted). |
| Chen et al; 2014  Taiwan and China | 7 | Age; postbronchodilator FEV1 (% predicted); BMI; the number of severe exacerbations in the preceding 3 years; mMRC dyspnea scale; SpO2 %; and Charlson index. |
| Chubachi et al (abstract); 2016  Japan | 19 | Anemia; underweight; obesity; chronic renal failure; chronic heart failure; osteoporosis; anxiety; depression; lung cancer; other cancer; diabetes mellitus; dyslipidemia; hypertension; hyperuricemia; cerebrovascular disease; ischemic heart disease; gastric ulcer; gastro-esophageal reflex disease (GERD) and benign prostatic hypertrophy |
| De Torres et al; 2017  Spain | 8 | Age; pack-year history; BMI; FEV1%; FVC%; 6MWD; MMRC and CAT. |
| Divo et al. abstract; 2016  Not indicated | 8 | Not indicated |
| Fens et al.; 2013.  Netherland | 12 | Postbronchodilator FEV1 %pred; CT emphysema score (perc15); Chronic bronchitis; Use of long-acting bronchodilators; Dyspnea at rest; cardiovascular disease; Body Mass Index; Diabetes; Reversibility in FEV1; eNose PC1; eNose PC4; Pack-years |
| Guillamet RV et al.; 2018.  USA | 14 | Demographics, comorbidities included in Charlson’s comorbidity index, presence of atopy, obesity, number of admissions, prescriptions for inhalers grouped as short acting beta-agonist, long-acting beta-agonist, anticholinergics, steroids and their combinations, prescriptions for oral steroids, beta-blockers and statins |
| Harrison SL et al.; 2014  UK | Not indicated | Not indicated |
| Haghighi et al, 2019.  USA | 75 | The segmental variables included bifurcation angle (θ), air- way circularity (Cr), wall thickness (WT) and hydraulic diameter (Dh), fractional air volume change (ΔVairF), the determinant of Jacobian (Jacobian), and aniso- tropic deformation index (ADI), functional small airway disease percentage (fSAD%) and emphysema percentage (Emph%), TLC and RV as (βtissueTLC and βtissueRV), ratio of apical-basal distance over ventral-dorsal distance at TLC (lung shape). Overall, there were 32 local/segmental structural variables, 35 lobar structural variables and 8 global structural variables. |
| Kim W.J et al; 2017  Asia | 8 | Age, body mass index (BMI), cigarette smoking, mMRC dyspnoea scale, the St George’s Respiratory Questionnaire (SGRQ) score, Charlson comorbidity index (CCI),15 FEV1, FVC and FEV1/ FVC. |
| Kim S et al; 2017.  Asia | 15 | Body mass index (BMI), cigarette smoking amount, mMRC score, CAT score, white blood cells (WBCs) with polymorphonuclear neutrophils (PMNs), eosinophils, interleukin (IL)-6, C-reactive protein (CRP), uric acid, EI, FEV1, FVC, and FEV1/FVC. |
| Kukol et al. 2019;(abstract).  Russia | Not indicated | Not indicated |
| Lee et al, 2019,  Korea | 7 | Age, BMI, post BD FEV1%, CAT score, history of asthma, DLCO % and smoking status. |
| Li et al. abstract; 2016 | 13 | ﻿Post-bronchodilator FEV1/FVC, % predicted FEV1, % predicted FVC, FEV1 reversibility, pack-years cigarette smoking, TLC -950 HU, RV -856 HU, Apex/Base ratio -950 HU, Apex/Base slope -950 HU, FACIT physical wellbeing score, pulse following six-minute walk, gender, and BMI |
| Liang et al, 2019:  Korea | 14 | Smith antigen (Sm), Ribosomal phosphoprotein P0 (P0), Ro/Sjögren syndrome type A antigen (SS-A), La/Sjögren syndrome type B antigen (SS-B), DNA topoisomerase I (Scl70), Histidyl-tRNA synthetase (Jo1), U1 small nuclear ribonucleoprotein (U1-SnRNP), Thyroid peroxidase (TPO), Proteinase-3 (PR3), Myeloperoxidase (MPO), demographics, lung function, CAT score, dyspnea score. |
| Lopes et al; 2019.  Brazil | 13 | Age, gender, education level, marital status, smoking status and lung function, dyspnea, illness perception, social support, health efficacy, clinical control, health related quality of life and physical activity. |
| Ning et al; 2016,  (abstract).  China | Not indicated | Not indicated |
| Peters et al; 2016.  Netherlands | 11 | FEV1% of predicted, body composition (BMI kg m−2), exercise capacity (VO2 max% of predicted), subjective symptoms, dyspnea emotions, fatigue, subjective impairment, behavioral impairment, general quality of life, health-related quality of life and satisfaction with relationships. |
| Pikoula et al; 2019.  UK | 15 | Body mass index (BMI), smoking status (current or ex), atopy, airflow obstruction as defined by Global Initiative for Chronic Obstructive Lung Disease (GOLD) stage [21]: 1 (FEV1% predicted > = 80%), 2 (50% < = FEV1% predicted < 80%), 3 (30% < = FEV1% predicted <50%) and 4 (<= FEV1% predicted < 30%)– and eosinophil % of white blood cell counts, gastro-esophageal reflux disease (GERD), chronic rhinosinusitis (CRS), diabetes, anxiety, depression, ischemic heart disease (IHD), hypertension, heart failure, sex, height. treatment as COPD therapy type with regards to different combinations of inhaled corticosteroids (ICS), Long Acting Muscarinic Antagonists (LAMA) and/or Long Acting Beta-2 Antagonists (LABA) as: a) no therapy (none of LAMA, LABA prescribed), b) mono-therapy (prescription of LABA or LAMA only), c) dual therapy (prescription of either LABA&LAMA or LABA&ICS or LAMA&ICS), and c) triple therapy: prescription of all LABA, LAMA and ICS. |
| Rodrigues et al.; 2018  Brazil | 19 | Age; Gender; BMI; FVC (l); FVC (%pred); FEV1 (l); FEV1 (%pred); FEV1/FVC; GOLD, I/II/III/IV; FFMI; 6MWT (m); 6MWT (%pred); IRMQF (kg); m MRC (0–4 pts); MIP (cmH2O); MIP (%pred); BODE index, I/II/III/IV; Comorbidities (n); Smoking history (pack-years); Follow-up (months) |
| Scarlata et al; 2018.  Italy | Not indicated | Not indicated |
| Xavier F et al; 2019.  Brazil | Not indicated | Not indicated |
| Yoon et al.; 2019  Korea | 7 | Age, BMI, smoking status, history of asthma, COPD assessment test (CAT) score, FEV1, DLCO. |

**Table S5: Number and list of variables used for severe asthma phenotyping.**

| **Reference ID and country** | **Population age** | **Number of variables** | **Variables considered for analysis** |
| --- | --- | --- | --- |
| Brinkman et al, 2011 (abstract). Multicountries | Adult | Not indicated | Not indicated |
| Desai et al. 2011. UK | Adults | Not indicated | Not indicated |
| Diver et al. 2018. UK | Adults | 1 | Microbial profiles were obtained through 16S rRNA gene sequencing. |
| Fitzpatrick et al, 2018.  USA | Children | 12 | Duration of asthma in months, baseline FEV1 percent predicted, and the best postbronchodilator FEV1 percent predicted, sex, race (white, black, or other) and ICS group (none, low-dose, or high-dose), Beta agonist use over the previous 3 months, the frequency of symptoms, the magnitude of atopic sensitization, and exhaled nitric oxide quartile. |
| Freitas PD et al. 2018 (abstract); Brazil | Adults | Not indicated | Not indicated |
| Gomez et al, 2017. USA | Adults | 12 | Baseline FEV1% predicted, baseline FVC% predicted, baseline FEV1/FVC ratio, FEV1% predicted and FVC% predicted after maximal bronchodilation with albuterol, % of FEV1 bronchodilator response, age of asthma onset, asthma duration, gender, Treatment, and serum YKL-40 (ng/mL). |
| Jang et al, 2017; Korea | Adults | 5 | Age at the onset of asthma, BMI, FEV1/FVC ratio, amount of cigarette smoking, and PC20 |
| Konstantellou et al.  2015; Greece | Adults | 5 | Patients' demographics, pulmonary function tests, inflammatory cells in induced sputum, bronchial hyper- responsiveness (BHR, PD15 to methacholine) and treatment regimens were recorded. |
| Lau et al, 2017:  Singapore | Adults | Not indicated | Not indicated |
| Moore et al 2010; USA | Adults | 35 | Gender; race; BMI; age at enrollment; age of asthma onset; asthma duration ; pre-bronchodilator >6 hours withholding of bronchodilator: fev1 % predicted; FFVC % predicted; FEV1/FVC; post-bronchodilator as best values after 6-8 puffs of albuterol: fev1 % predicted; FFVC % predicted; maximal% change in FEV1; number of positive SPT; composite medications used as: corticosteroids used; total number of controllers ;type of controllers; beta-agonist frequency score; composite health care utilization as : frequency/severity past year; intensity/ICU ever in lifetime; composite asthma symptoms as : general symptoms score; symptoms with activities ; composites pattern of skin prick test as :cats/dogs; dust mites/cockroach; molds and pollens; composites triggers as : severity of allergy symptoms ; aspirin sensitivity/nasal polyps; sinusitis and sinus surgery; bronchitis/ pneumonia; composite co-morbidities as : GERD and HTN; composite family history as : parental asthma ;siblings with asthma; composite tobacco exposure: passive and remote ; composite of women hormone exposure. |
| Newby et al, 2018; UK | Adults | 23 | Gender, body mass index (BMI), smoking status, atopy, unscheduled visits to GP in last 12 months, intensive care unit (ITU) visits in last 12 months, hospital admissions in last 12 months, perennial rhinitis, seasonal rhinitis , eczema, nasal Polyps, reflux history, pre-bronchodilatorFEV1% predicted, pre-bronchodilator FVC% predicted, FEV1/FVC ratio pre-bronchodilator, blood eosinophils, total blood IgE, rescue steroid courses taken in last 12 months, beclomethasone dipropionate (BDP) equivalent inhaled corticosteroid dose, age at first assessment, age at onset of symptoms, oral steroid dose, and center. |
|
|
|
|
| Raherson et al, 2018 (abstract); France | Adults | Not indicated | Not indicated |
|
|
| Sekiya et al. 2015; Japan | Adults | 24 | Gender, n (%), Age, BMI, smoking status, pack years, Pack year, Hypersensitivity symptoms after exposure to furred pets, Allergic rhinitis, Chronic hyperplastic rhinosinusitis/nasal polyposis, Diabetes, Chronic obstructive pulmonary disease, Inactive pulmonary tuberculosis, Any physiological diseases, Asthma duration, History of hospitalization for asthma, Hospitalizations for asthma in the past year, History of NFA requiring mechanical ventilation, Daytime symptoms, Limitation of activities, Nocturnal symptoms/awakening, ICS, SABA, OCS, Viral infection/common cold, Bacterial infection |
|
|
|
|
| Serrano Pariente et al. 2015; Spain | Adults | 44 (reduced form 77) | Sex; Age; Level of education; Smoking; GHQ score; Psychiatric comorbidity; TAS score; Presence of alexithymia; Asthma severity (GINA); FEV1 (post NFA episode); Age at onset of asthma; Presumptive NSAID intolerance; History of atopy; History of rhinosinusitis; Medical care for asthma; Number of prior hospitalizations for asthma; Past mechanical ventilation for asthma; Hospitalization for asthma in the past 12 months; Past ED visits for asthma in the past 12 months; Past NFA attacks; Past hospitalization for asthma; Treatment for asthma; Inhaled corticosteroids dose (mcg/day of budesonide) Long-acting beta agonist (formoterol; salmeterol); Oral corticosteroids; Theophylline; Ipratropium bromide; Trigger of the NFA episode; Sudden onset of NFA episode (<2 h); Impaired consciousness level on hospital admission; Tracheal intubation required; Respiratory arrest; Hours under mechanical ventilation; pH on arterial blood gas analysis on hospital admission PaCO2 on arterial blood gas analysis; Written asthma action plan followed; Season of the NFA episode; Days in hospital; Days in ICU; Total dose of systemic steroids in first 5 days in hospital (mg prednisone); Medical complications during hospitalization; Eosinophil count cells on hospital admission; Number of positive skin prick-tests per patient; Sensitization to Alternaria alternata; Sensitization to fungi. |
|
|
| Simpson et al (abstract) ; 2017.  Multi-country | Adults | Not indicated | Not indicated |
| Taniguchi et al; 2014;(abstract)  Japan | Adults | 13 | Not indicated |
| Wu et al; 2014.  USA | Adults | 45 | 16 symptom-related, 10 medication-related, 10 asthma history/comorbidities–related, 7 allergy-related, 5 lung function–related, and 3 health care use (HCU)–related variables. |
| Weng-Jing Ye et al. 2017; China | Adults | 22 | Sex, age, age at onset, asthma duration, BMI, smoking index, family history, Disease severity and risk Respiratory failure, COPD Lab tests IgE, EOS, allergen detection Lung function, FVC% pred, FEV1% pred, FEV1/FVC, post FVC% pred, post FEV1% pred, post FEV1/FVC, change in FEV1, Medicine use ICS, Health care utilization in the past year, Health care utilization in the past. |
|
|
|
| Youroukova et al. 2017; Bulgaria | Adults | 8 | Age of asthma onset, duration of diseases, atopy, smoking, blood eosinophils, nonsteroidal anti-inflammatory drugs hyper- sensitivity, baseline FEV1/FVC and symptoms severity. |
|
|
|

**Table S6: Number and list of variables used for rhinitis phenotyping.**

| **Reference ID and country** | **Number of variables** | **Variables considered for analysis** |
| --- | --- | --- |
| Adnane et al.2017; Marocco | 9 | Not indicated |
|
|
| Agache et al. 2010; France | 11 | Male sex; family history of asthma; breastfeeding < 2 months; passive/active smoking; obesity; pets/molds exposure; high total serum immunoglobulin E (IgE); polysensitization (sensitized to 3 seasonal pollens with different structure); mixed sensitization (seasonal and perennial allergens); severe rhinitis (according to the Allergic Rhinitis and its Impact on Asthma guidelines); and lack of allergen-specific immunotherapy (SIT) for rhinitis preceding asthma diagnosis. |
|
|
|
|
| Bousquet et al. 2015; France | 18 | Not indicated |
|
|
|
| Burte et al. 2015; France | 21 | Report of nasal symptoms; current/ever symptoms; persistence and disturbance of these symptoms; seasonal pattern; sensitivity to seven triggers; report of allergic rhinitis; hay fever; conjunctivitis; sinusitis and eczema; report of diagnostic of allergy by a physician; SPT; report of spray; report of drug except spray; and allergic immunotherapy since the last survey |
|
|
| Herr M et al.2012. France | 27 | Wheeze occasional, wheeze recurrent, limitations of daily activities, sleep disorders, Nocturnal dry cough apart from a cold, Allergic rhinitis–like symptoms, Atopic dermatitis, 1-3 Upper respiratory tract infections (apart from colds), 4 or more Upper respiratory tract infections (apart from colds), 1-3 Lower respiratory tract infections, 4 or more Lower respiratory tract infections, Inhaled bronchodilators, Inhaled corticosteroids, Hospital-based care because of respiratory disorders, Emergency department visit, Admission to hospital, Total IgE (U/mL), Total IgE >_45 U/mL, Blood eosinophilia (eosinophils/mm3, Eosinophilia >_470 eosinophils/mm3, Allergenic sensitization, Food allergens, Inhalant allergens, Allergenic sensitization >_0.70 U/mL, Sensitization to >_2 allergens. |
|
|
| Kurukulaaratchy et al. 2015.  UK | 13 | Atopic status at age 18 years, asthma at age 18 years, eczema at age 18 years, age at which rhinitis appeared, seasonality of rhinitis symptoms, total IgE level (log10), BDR, BHR DRS, mean Feno value (log10), FEV1, forced vital capacity (FVC), FEV1/FVC ratio, and forced expiratory flow at 25% to 75% (FEF25-75). |
|
|
|
| Lee E.L. et al 2016.  Korea | 15 | Sex; body mass index; socioeconomic status, including income and maternal educational level; environmental factors, including prior exposure to environmental tobacco smoke (ETS); parental history of allergic diseases (AD, AR, and/or asthma); presence of allergic disease; comorbidities at the time of enrollment; treatment of rhinitis within the previous 12 months; SPT, total serum IgE, blood eosinophil percentages, and pulmonary function test results at the time of enrollment; and the presence of rhinitis at the time of enrollment. |
|
|
|
|
|
|
|
| T.A Nakayama et al. 2012.  Japan | 16 reduced to 5 | Anterior nasal discharge, posterior nasal discharge, facial pain, nasal obstruction, specific IgE to house-dust mites, specific Ige to dermatophagoides pteronyssinus, total IgE (IU/ml), polyp score, CT score, staphylococcus aureus ,decreased sense of smell ,ATA ,mucin ,Peripheral basophil count (/μl),mucosal eosinophil count (/HPF)peripheral eosinophil count (/μl). Eigenvalue |
|
|
|
| ZM Soler et al.2015.  USA and Canada | 32 | This included 3 demographic variables, 14 comorbidity/exposure variables, 3 objective measures of CRS, and 83 patient-reported outcome measure (PROM) variables, including those from 5 validated questionnaires. Prior to performing a cluster analysis, PROM variables were reduced to meaningful factors that contained questions with a high degree of correlation. Corresponding composite scores were determined. For instance, the SNOT-22 questionnaire, which consisted of 22 individual questions related to sino-nasal QOL, was reduced to 3 factors. Similarly, the RSDI was reduced to 4 factors and the SF-12 to 2 factors (Table 1). The PSQI and PHQ did not reduce to meaningful factors, thus total scores were used. |
|
|
|
|

**Table S7: Number and list of variables used for asthma and COPD overlap phenotyping.**

| **Reference ID and country** | **Number of variables** | **Variables considered for analysis** |
| --- | --- | --- |
| De Vries et al. 2018.  Netherlands | Not indicated | Not indicated |
| Fingleton et al. 2017.  New Zealand and China | 12 | (FEV1) (% predicted), FEV1/ (FVC) ratio (%), bronchodilator reversibility (% change in FEV1 from baseline after salbutamol administration), peak expiratory flow (PEF) variability (expressed as % of mean), KCO (% predicted), log FENO (ppb), log IgE (IU·L−1), log hsCRP (mg·L−1), age of onset of respiratory symptoms, body mass index, total SGRQ score and cigarette smoke exposure (pack-years). Functional residual capacity was used as an additional variable in the NZRHS. |
| Górska K t al. 2017.  Poland | Not indicated | Not indicated |
| Rootmensen et al. 2016.  Netherlands | Not indicated | Not indicated |
